# Supplementary material for: Rational Design of a Modular mRNA Vaccine Platform for Rapid Adaptation to SARS-CoV-2 Variants
Source: Research Square preprint supplement (doi:10.21203/rs.3.rs-7726990/v1), 2025-10-28
Supplement: Supplementary file 1 [file 92594a0874884bfeb57d7048.pdf]

## Supplementary information

**A**

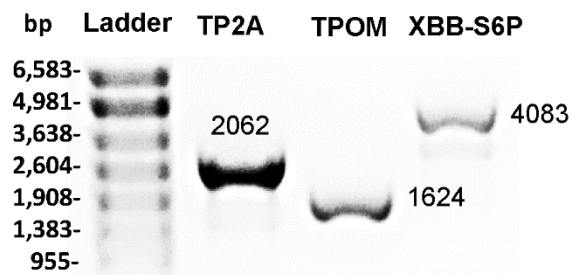

**B**

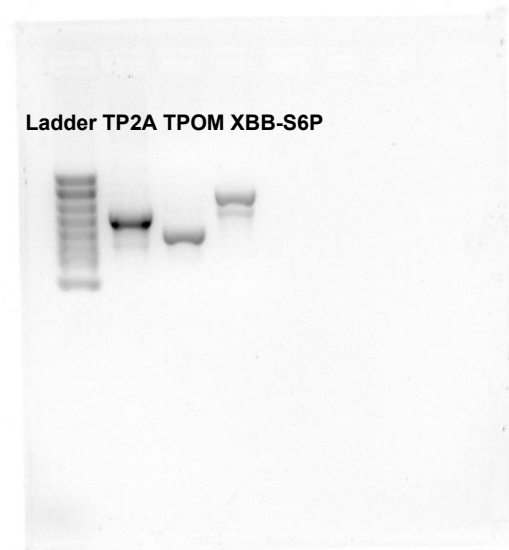

**Supplementary Figure 1:** (A) Agarose gel electrophoresis of *in vitro* transcribed RNA. RNA samples were transcribed *in vitro* and purified using lithium chloride precipitation. Lane 1: RNA ladder; Lane 2 – 4: *in vitro* transcribed RNA samples. The RNA was separated on a 1 % denaturing agarose gel. (B) The original uncropped gel.

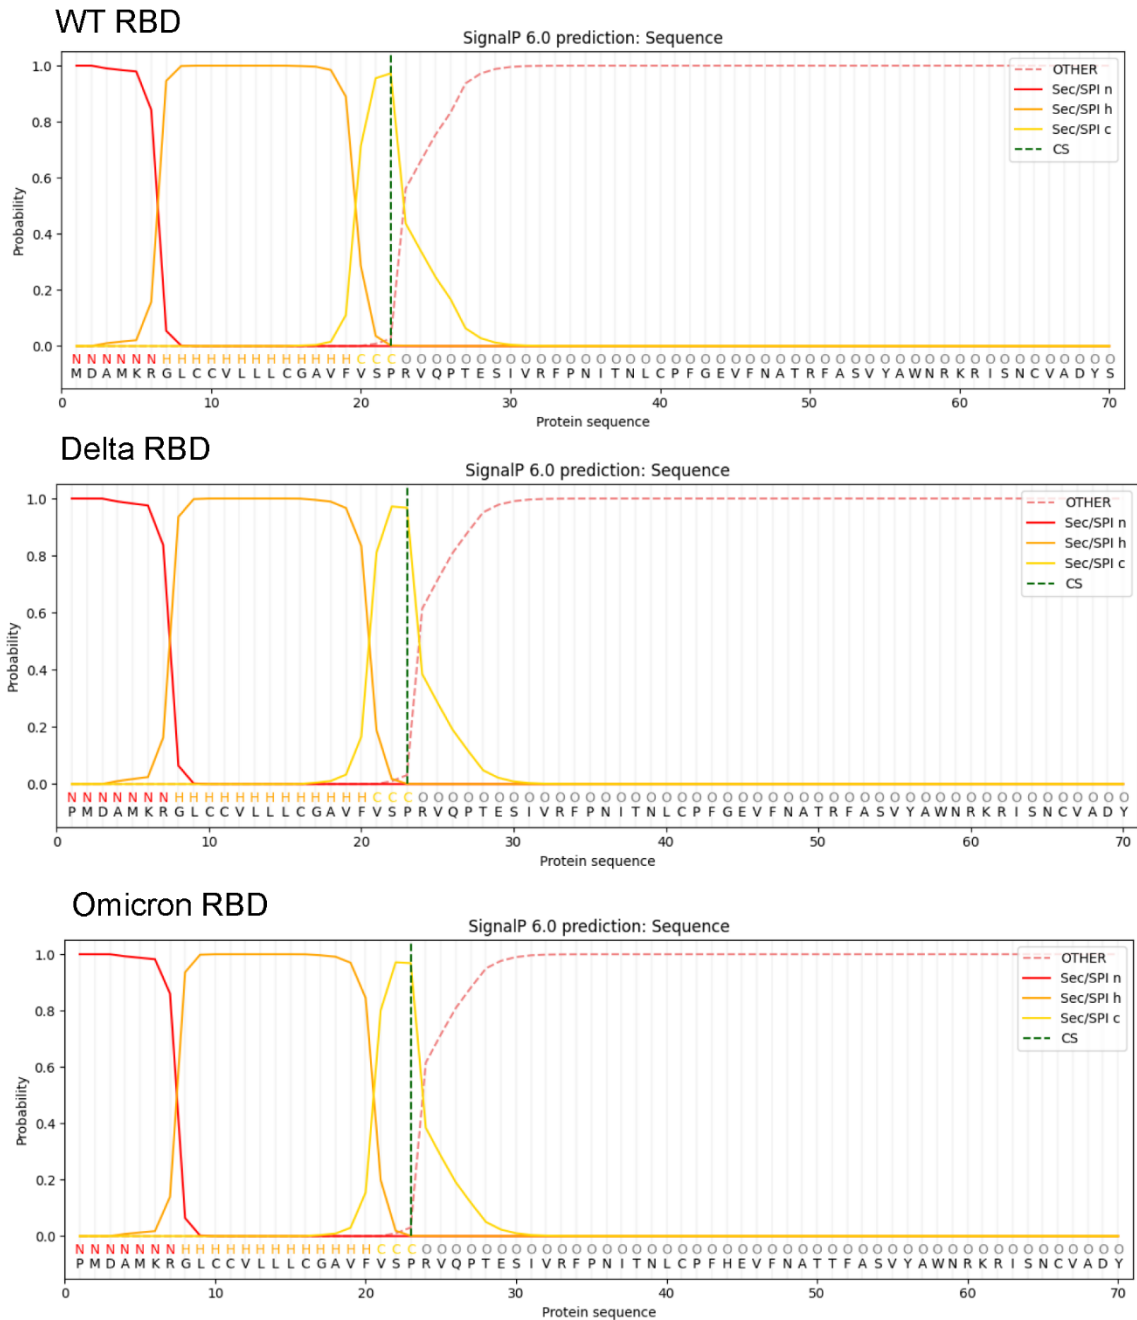

**Supplementary Figure 2:** The additional proline residue (P) that left at the N-terminus due to P2A has no effect on signal peptide activity predicted by SignalP-6.0.

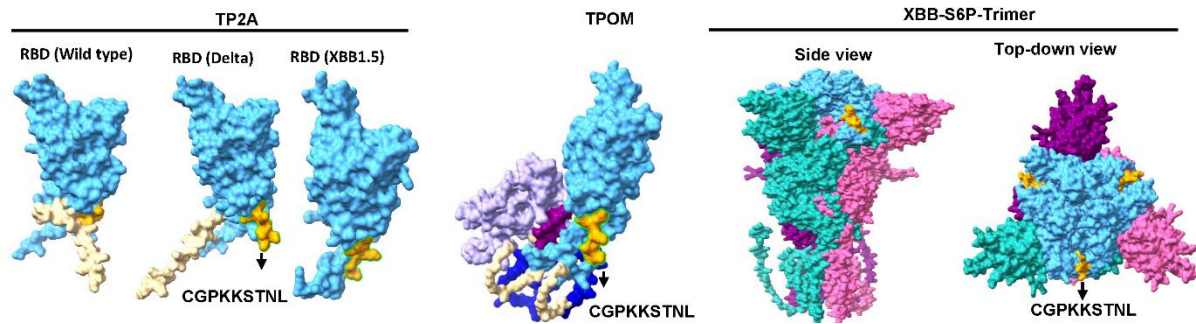

**Supplementary Figure 3:** The predicted position of the H-2D<sup>d</sup>-restricted peptide epitope CGPKKSTNL (yellow) within RBD region (light blue) of the protein structure in mRNA vaccine candidates.
